# Supplementary material for: The double PHD finger domain of MOZ/MYST3 induces α-helical structure of the histone H3 tail to facilitate acetylation and methylation sampling and modification
Source: PubMed Central journal article supplement (PMC3902925; doi:10.1093/nar/gkt931), 2013-10-21

**FIGURE S1**

**Binding of MOZ to histones H3 and H4 is dependent on their acetylation and methylation status.**

(A) SDS-PAGE and Coomassie staining was used to verify normalized amounts of each GST-fusion protein for comparison in binding and acetylation experiments. (B) Pulldown assays using immobilized GST or GST-DPF and calf thymus extracted core histones. Retention of specific histones was detected by western blotting. (C, D, G, I, J) Pulldown assays showing association of GST-MOZ proteins with immobilized biotin-conjugated H3 and H4 peptides containing modifications, as indicated. To detect the weaker H4 binding longer exposures relative to H3 binding assays were used. (E) Western blots showing association of H3K4me3 or H3K9me3-labelled histones with immobilized GST-MOZ DPF. (F) Association of *in vitro* translated <sup>35</sup>[S]-labelled FLAG-MOZ or FLAG-MOZ-N (1-1117) proteins with immobilized biotin-conjugated H3, H3K4me3 or H3K9me3 peptides. (H) Pulldown assays showing association of GST-MORF DPF with immobilized H3 and H4 peptides containing modifications, as indicated. Note that for clarity, gel images in (I) have been cropped to allow them to be presented in a logical order for comparison.

**FIGURE S2**

**Co-localisation of MOZ with acetylated H3, and exclusion of MOZ from H3K4me3 enriched chromatin.**

(A) U2OS cells were seeded onto coverslips and transfected after 24 hours with expression plasmids encoding FLAG-MOZ. After 48 hours post-transfection, cells were fixed in 4%

paraformaldehyde, permeabilised and stained with mouse anti-FLAG antibodies (red) or rabbit antibodies specific against H3K4me3, H3K9me3 or pan-acetyl H3 as indicated (green). Secondary staining was achieved using anti-mouse Alexa594 and anti-rabbit Alexa488 secondary antibodies. Merged images indicate the degree of colocalisation of stained foci. Nuclear DNA was stained using Hoechst 33258 (blue).

**(B)** Chromatin IP assays showing that MOZ-associated chromatin is enriched in H3K14Ac but not H3K4me3. Crosslinked chromatin was prepared from K562 cells, immunoprecipitated with  $\alpha$ -MOZ (KAT6A) antibody or IgG control. After reversal of crosslinks and SDS PAGE, western blots were used to detect H3K14Ac and H3K4me3.

### **FIGURE S3**

#### **Electron density of H3, H3K9ac and H3K14ac peptides**

**(A)** Stereo-image of sigmaA weighted 2Fobs-Fcalc electron density map of H3 contoured at one sigma level (depicted in red) in complex with the MOZ DPF domain (depicted in blue). Hydrogen bonding interactions involving H3K4 and H3R8 are shown as black dashed lines.

**(B)** Stereo-image of sigmaA weighted 2Fobs-Fcalc electron density map of H3K9ac contoured at one sigma level (red) in complex with the MOZ DPF domain (blue). Hydrogen bonding interactions involving H3K4 and H3R8 are shown as black dashed lines.

**(C)** Stereo-image of sigmaA weighted 2Fobs-Fcalc electron density map of H3K14ac contoured at one sigma level (red) in complex with the MOZ DPF domain (blue). Hydrogen bonding interactions involving K4, R8 and K14ac are shown as black dashed lines.

## **FIGURE S4.**

### **Alternative view of H3 interactions with MOZ DPF**

(**A,B**) Surface representation of the MOZ DPF domain colored according to electrostatic potential in complex with (**A**) unmodified H3 or (**B**) H3K14ac in red cartoon representation. (**C,D**) Close-up view of complex structures in stick representation highlighting the interactions with key residues labeled; blue denotes for MOZ DPF residues and red for H3 or H3K14ac. The DPF-H3 complex is shown in (**C**) and the DPF-H3K14ac complex in (**D**). Plausible hydrogen bonding interactions are indicated by dashed lines. Zinc atoms are shown as gray spheres.

## **FIGURE S5**

### **Superposition of MOZ DPF structures**

Superposition of MOZ DPF crystal structure (blue) in complex with residues 1-15 of H3K14ac (red) with crystal structure of MOZ DPF - H3 (residues 1-7) obtained in the presence of H3K14ac peptide and acetate (PDB code: 3V43 (Ref. 18); DPF domain: light blue; H3 peptide and acetate observed in the structure: orange).

# FIGURE S1

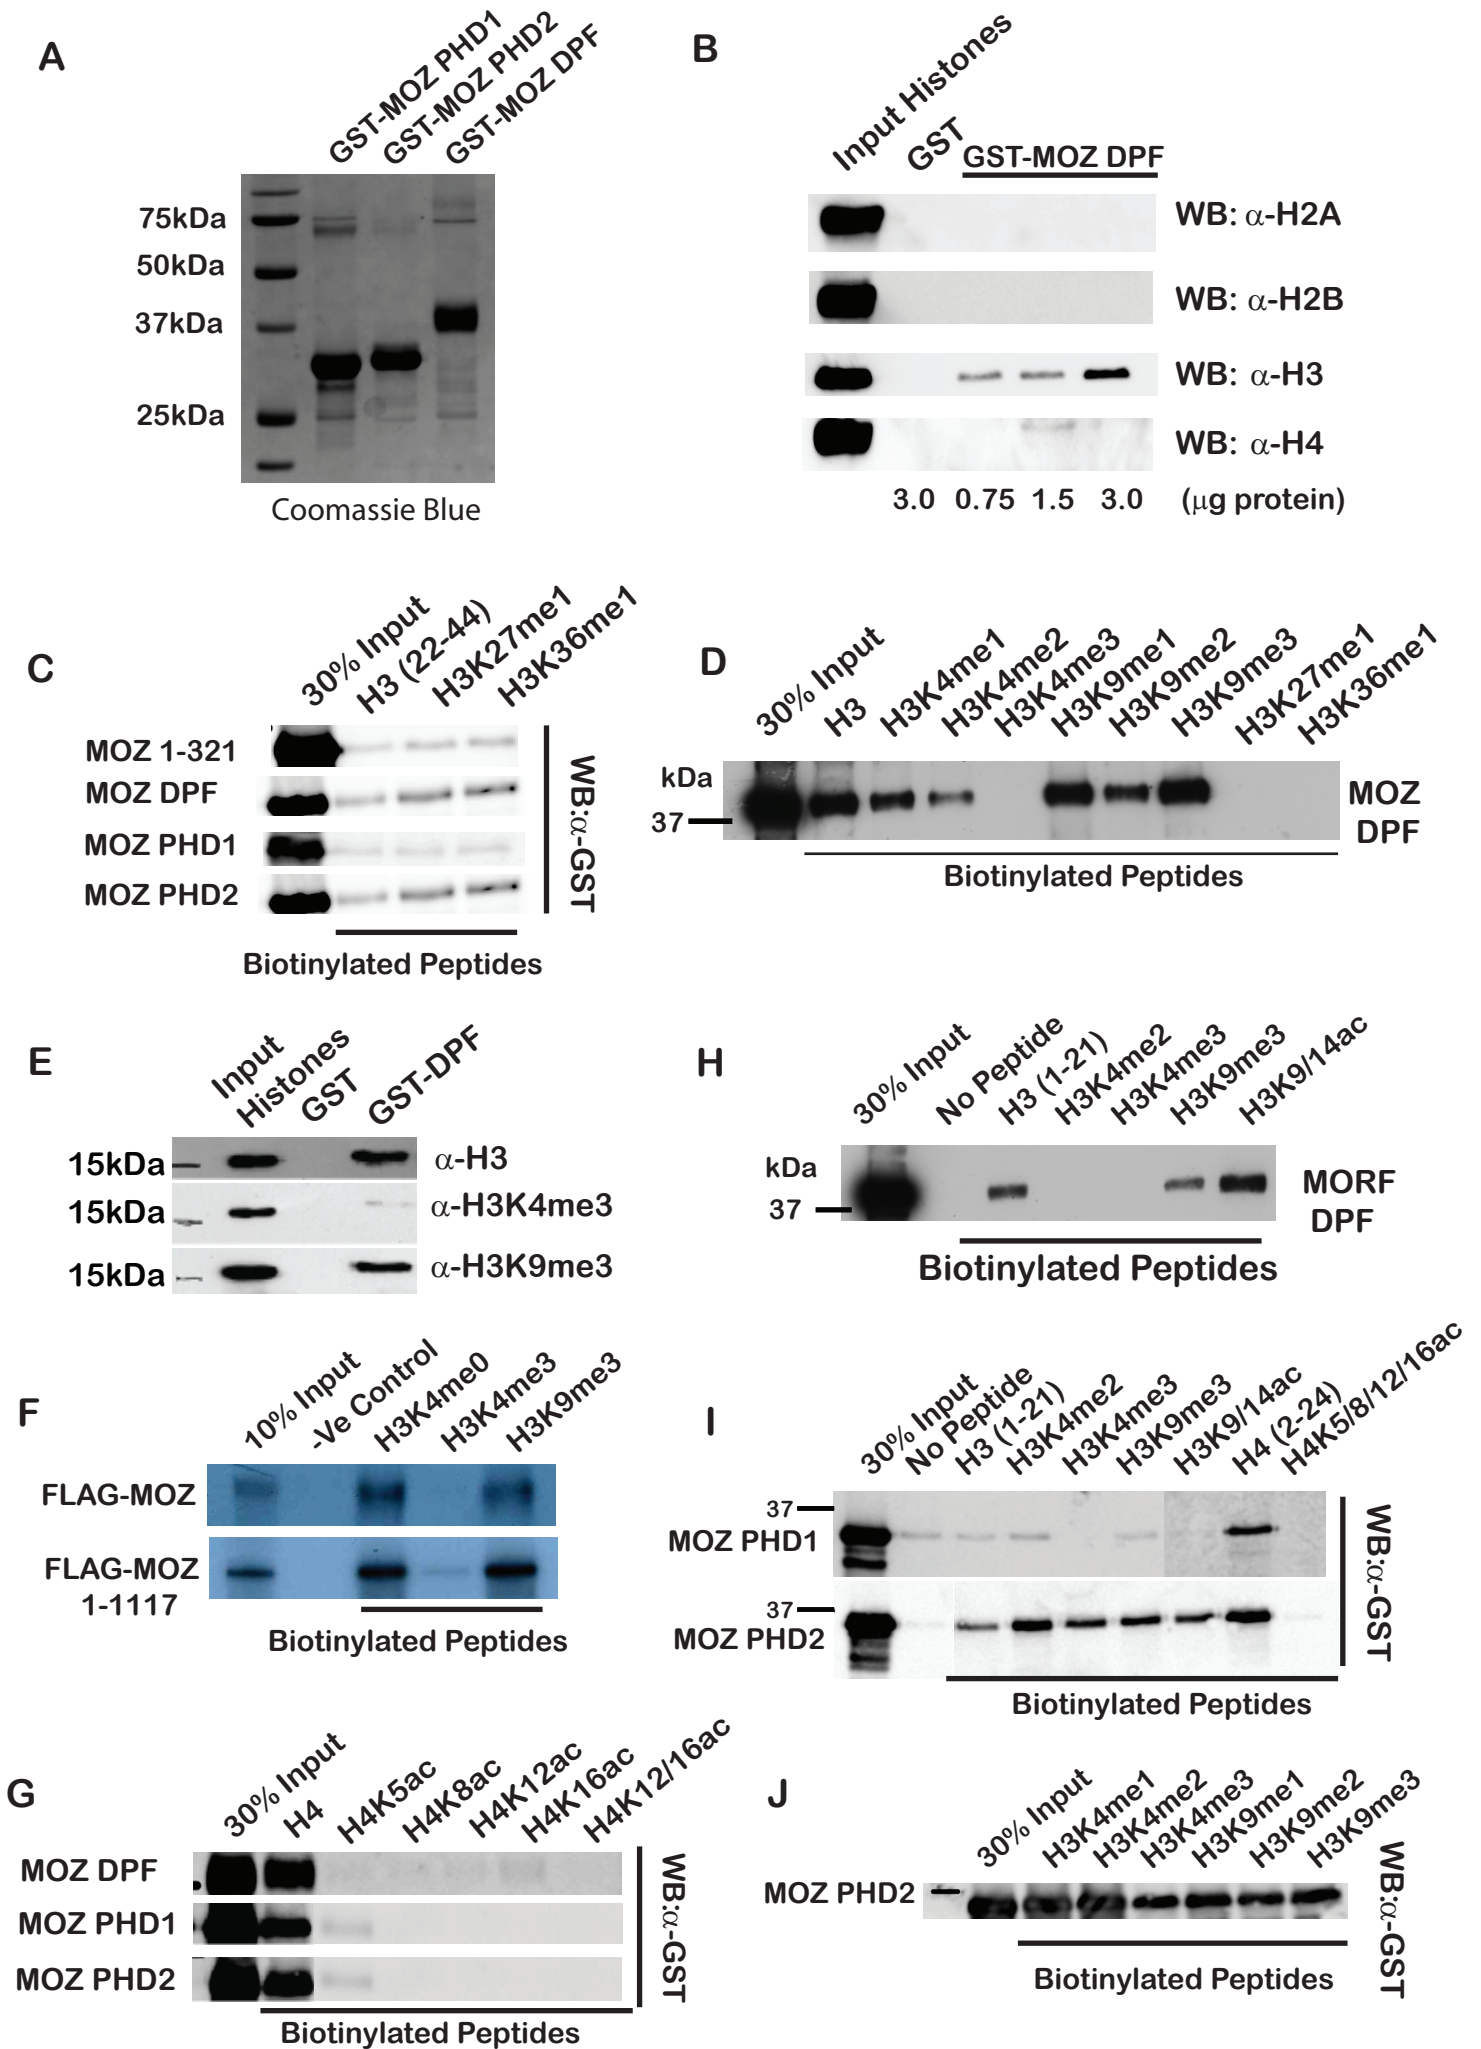

**FIGURE S2**

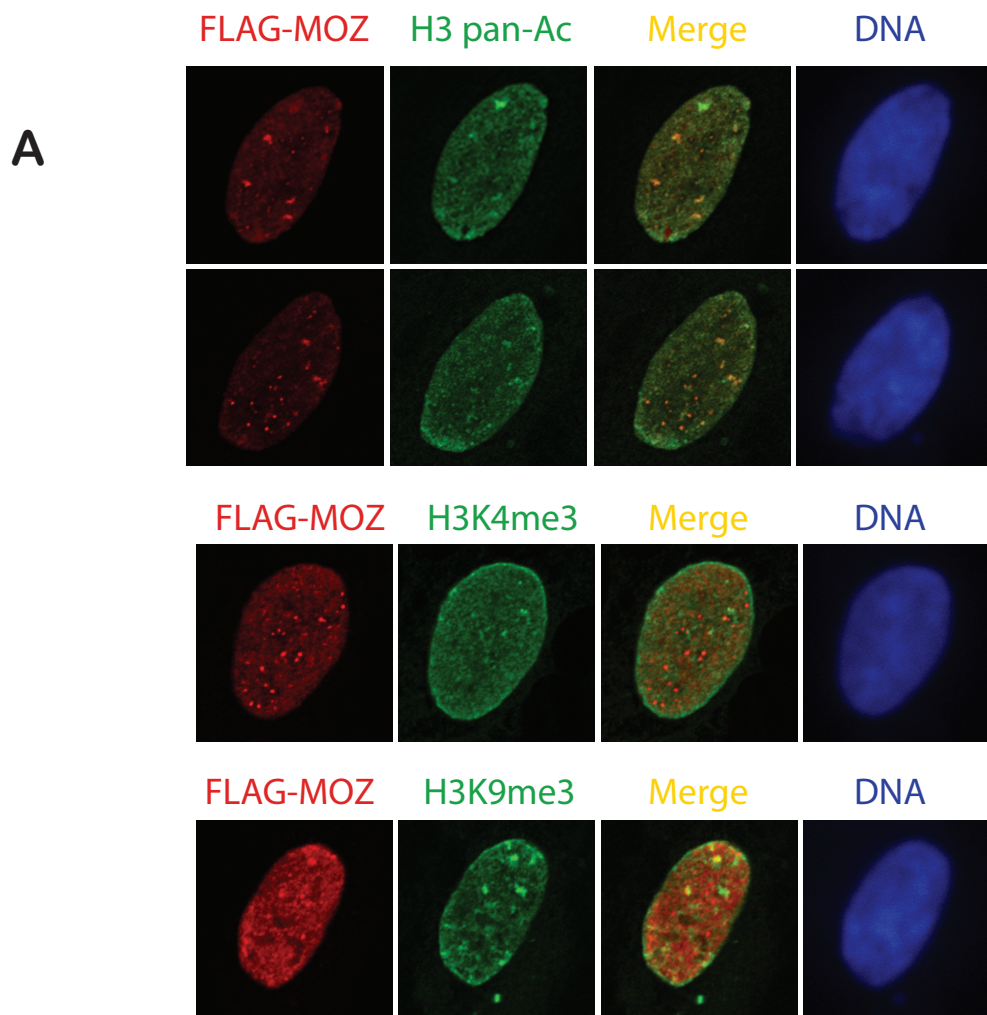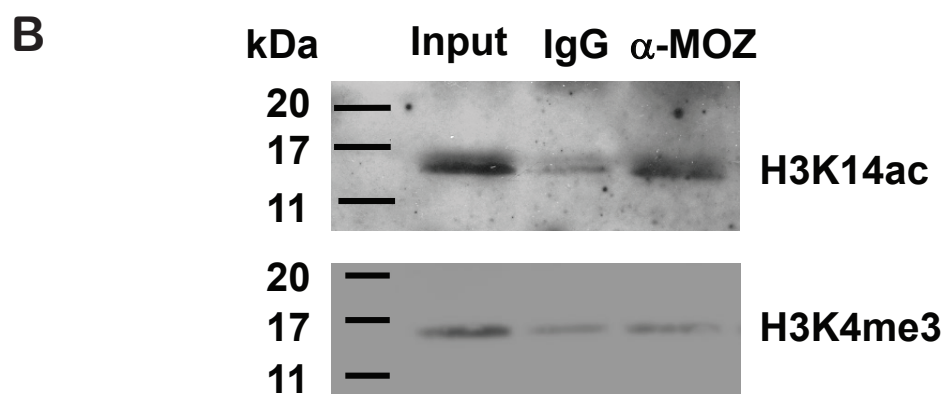

# FIGURE S3

## A MOZ DPF – H3

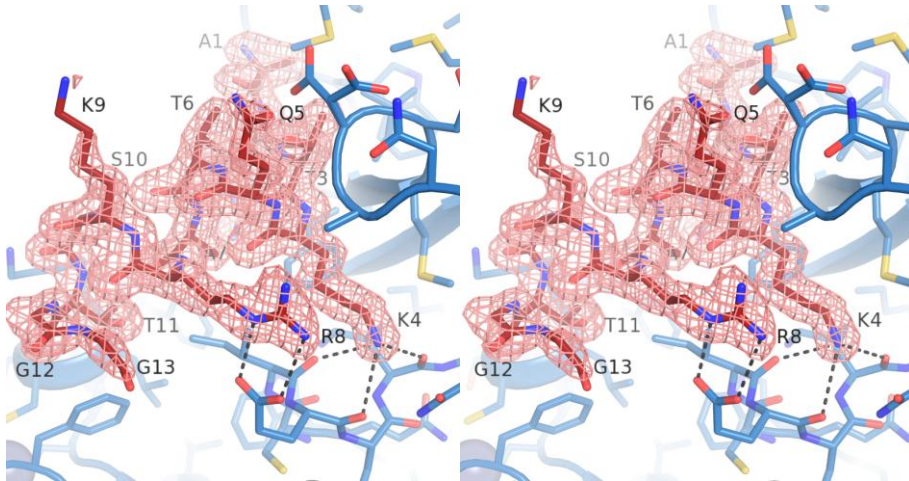

## B MOZ DPF – H3K9ac

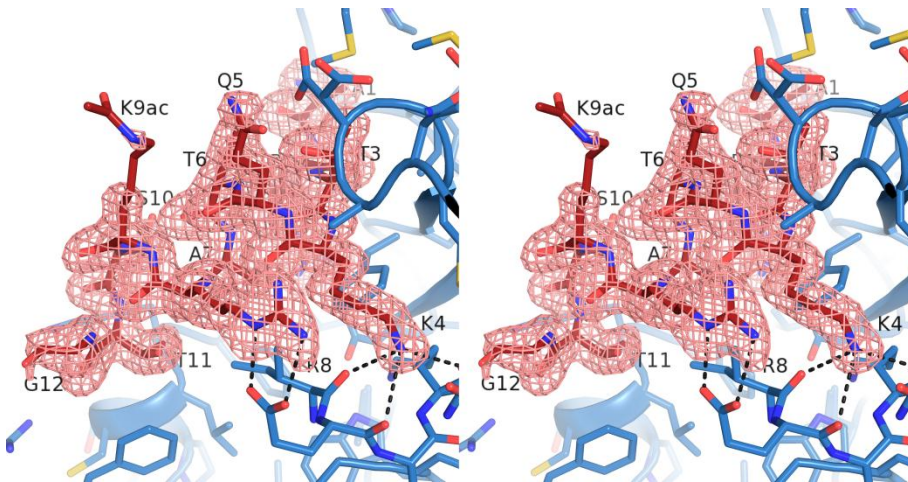

## C MOZ DPF – H3K14ac

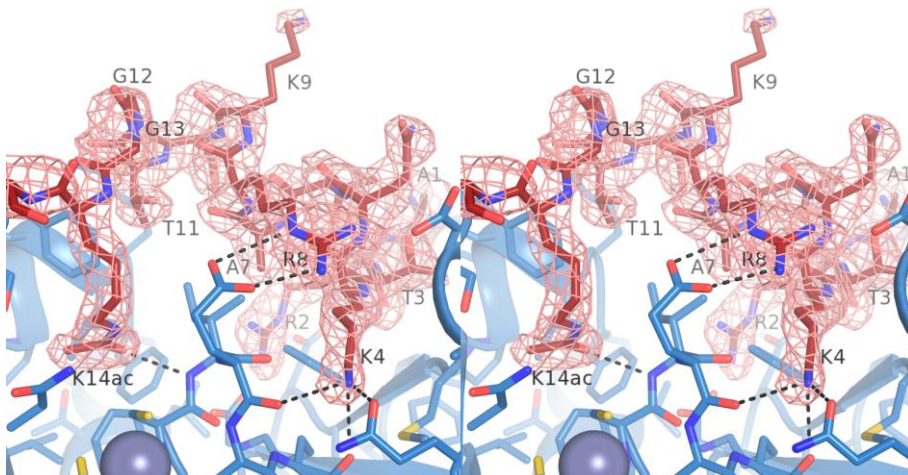

# FIGURE S4

## A DPF – H3

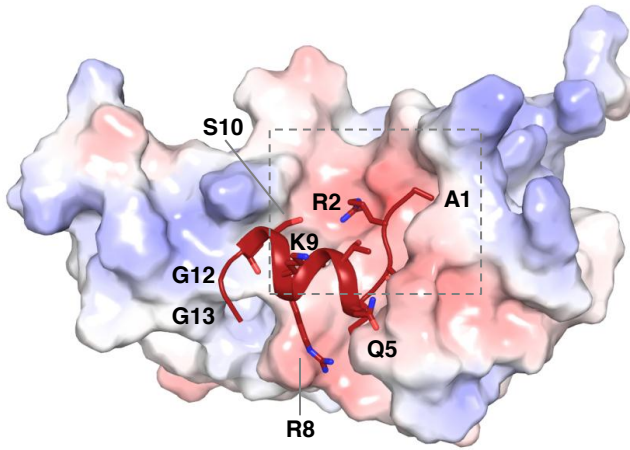

## B DPF – H3K14ac

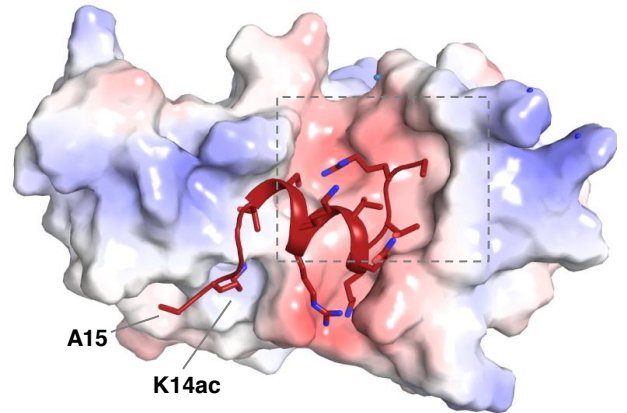

## C

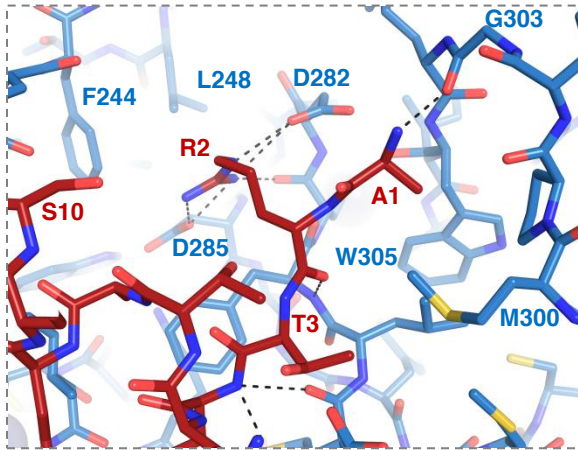

## D

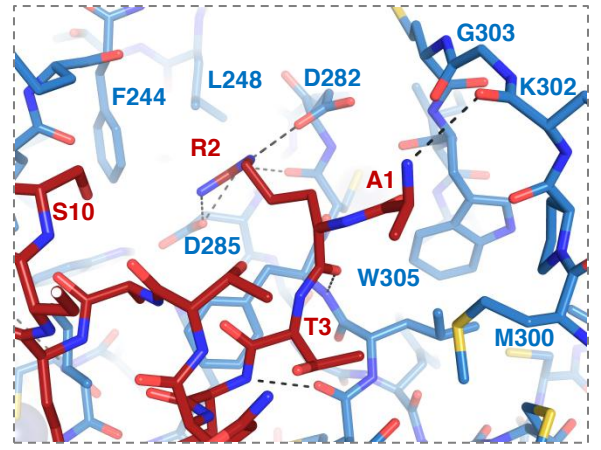

**FIGURE S5**

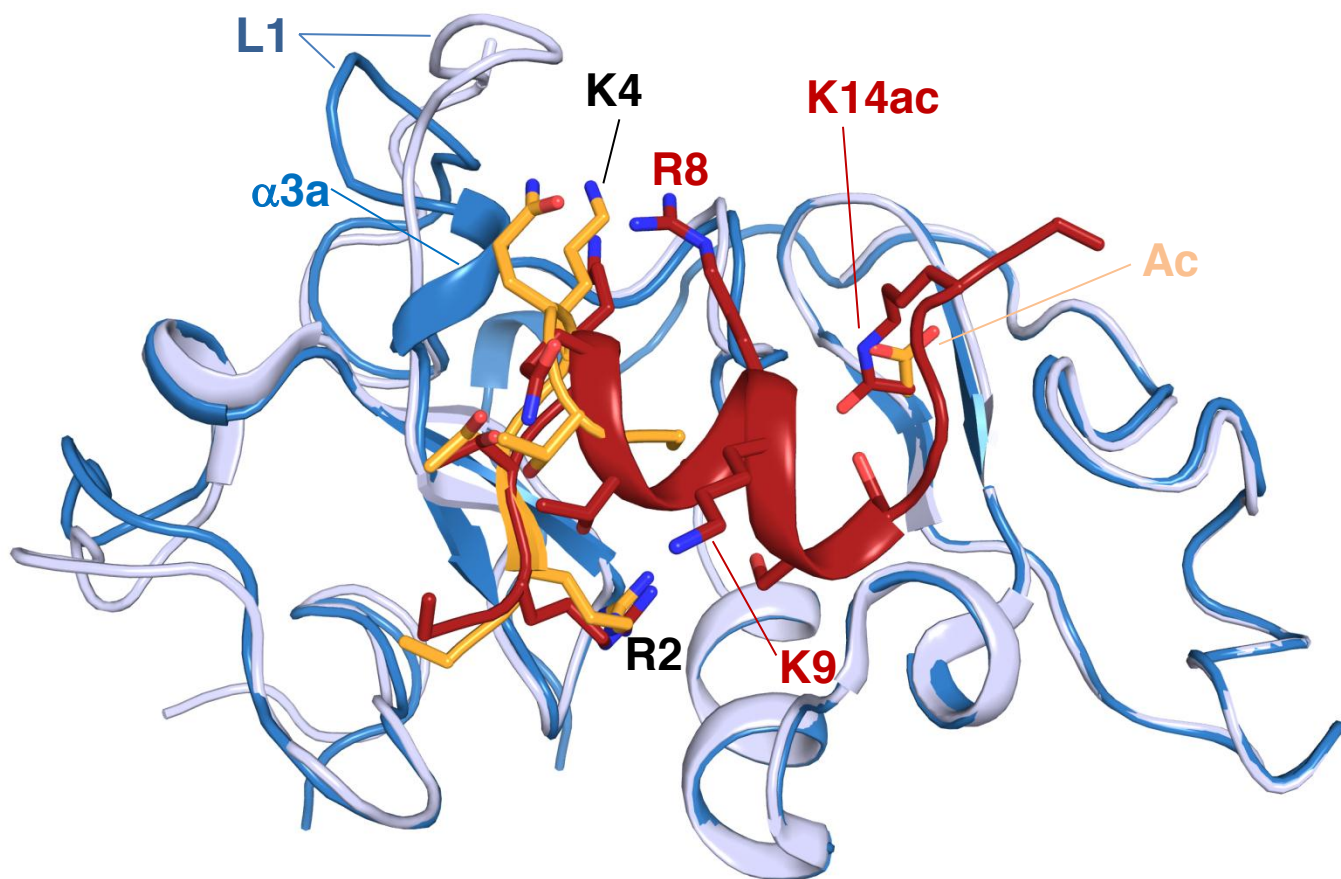

Supplement: supp_gkt931_nar-02188-m-2013-File008.pdf [file supp_gkt931_nar-02188-m-2013-File008.pdf]
